# Supplementary material
Source: MDPI journal article supplement (https://www.mdpi.com/2072-4292/14/13/3115)
Supplement: s1 [file s1]

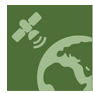

| Sector number | Geographic coordinates of sector |           | Mean cliff height [m a.s.l.] | Lithology [% area] |      | Shoreline exposure [°] | Mean slope [°] | Covering of medium and high vegetation [%] |
|---------------|----------------------------------|-----------|------------------------------|--------------------|------|------------------------|----------------|--------------------------------------------|
|               | Point x                          | Point y   |                              | Sand               | Clay |                        |                |                                            |
| 1 start       | 14.463470                        | 53.940684 | 36                           | 100                | 0    | 317                    | 36             | 80                                         |
| 1 end         | 14.465573                        | 53.941983 |                              |                    |      |                        |                |                                            |
| 2             | 14.467573                        | 53.943338 | 38                           | 80                 | 20   | 317                    | 36             | 80                                         |
| 3             | 14.469589                        | 53.944685 | 53                           | 80                 | 20   | 314                    | 36             | 40                                         |
| 4             | 14.471653                        | 53.946003 | 62                           | 80                 | 20   | 316                    | 35             | 20                                         |
| 5             | 14.473766                        | 53.947297 | 69                           | 80                 | 20   | 318                    | 3              | 90                                         |
| 6             | 14.475862                        | 53.948599 | 58                           | 80                 | 20   | 317                    | 34             | 95                                         |
| 7             | 14.477876                        | 53.949947 | 48                           | 80                 | 20   | 313                    | 37             | 100                                        |
| 8             | 14.479982                        | 53.951245 | 55                           | 80                 | 20   | 318                    | 38             | 100                                        |
| 9             | 14.482146                        | 53.952511 | 48                           | 100                | 0    | 319                    | 28             | 70                                         |
| 10            | 14.484188                        | 53.953844 | 77                           | 100                | 0    | 317                    | 30             | 60                                         |
| 11            | 14.486105                        | 53.955246 | 79                           | 100                | 0    | 313                    | 37             | 5                                          |
| 12            | 14.488093                        | 53.956608 | 38                           | 20                 | 80   | 315                    | 42             | 50                                         |
| 13            | 14.490205                        | 53.957902 | 33                           | 30                 | 70   | 321                    | 37             | 30                                         |
| 14            | 14.492315                        | 53.959197 | 49                           | 100                | 0    | 317                    | 36             | -                                          |
| 15            | 14.494388                        | 53.960514 | 40                           | 70                 | 30   | 321                    | 36             | 15                                         |
| 16            | 14.496494                        | 53.961802 | 41                           | 10                 | 90   | 318                    | 39             | 30                                         |
| 17            | 14.498842                        | 53.962944 | 51                           | 30                 | 70   | 318                    | 40             | 40                                         |
| 18            | 14.501334                        | 53.963933 | 35                           | 10                 | 90   | 329                    | 40             | 30                                         |
| 19            | 14.504113                        | 53.964638 | 34                           | 20                 | 80   | 335                    | 38             | 15                                         |
| 20            | 14.507035                        | 53.965146 | 32                           | 20                 | 80   | 347                    | 38             | 50                                         |
| 21            | 14.509989                        | 53.965542 | 21                           | 50                 | 50   | 351                    | 37             | 15                                         |
| 22            | 14.513011                        | 53.965790 | 19                           | 50                 | 50   | 354                    | 36             | 60                                         |
| 23            | 14.515984                        | 53.966215 | 18                           | 40                 | 60   | 350                    | 36             | 70                                         |
| 24            | 14.518950                        | 53.966626 | 21                           | 30                 | 70   | 351                    | 35             | 60                                         |
| 25 start      | 14.576472                        | 53.982691 | 40                           | 50                 | 50   | 338                    | 37             | 60                                         |
| 25 end        | 14.579223                        | 53.983455 |                              |                    |      |                        |                |                                            |
| 26            | 14.581965                        | 53.984241 | 45                           | 30                 | 70   | 337                    | 36             | 50                                         |
| 27            | 14.584754                        | 53.984955 | 51                           | 70                 | 30   | 340                    | 36             | -                                          |
| 28            | 14.587583                        | 53.985624 | 19                           | 90                 | 10   | 340                    | 37             | 10                                         |
| 29            | 14.590369                        | 53.986355 | 17                           | 90                 | 10   | 340                    | 36             | 30                                         |
| 30            | 14.593253                        | 53.986926 | 16                           | 70                 | 30   | 340                    | 37             | -                                          |
| 31            | 14.596125                        | 53.987528 | 20                           | 50                 | 50   | 346                    | 35             | -                                          |
| 32            | 14.598991                        | 53.988141 | 29                           | 40                 | 60   | 344                    | 36             | -                                          |
| 33            | 14.601857                        | 53.988753 | 34                           | 90                 | 10   | 345                    | 36             | -                                          |
| 34            | 14.604795                        | 53.989243 | 30                           | 90                 | 10   | 345                    | 36             | -                                          |

|    |           |           |    |    |    |     |    |    |
|----|-----------|-----------|----|----|----|-----|----|----|
| 35 | 14.607653 | 53.989870 | 25 | 90 | 10 | 344 | 36 | -  |
| 36 | 14.610530 | 53.990465 | 27 | 90 | 10 | 345 | 35 | 10 |
| 37 | 14.613378 | 53.991112 | 35 | 90 | 10 | 342 | 37 | 30 |
| 38 | 14.616238 | 53.991733 | 30 | 50 | 50 | 342 | 35 | 50 |
| 39 | 14.619060 | 53.992414 | 19 | 20 | 80 | 342 | 37 | 20 |
| 40 | 14.621886 | 53.993099 | 14 | 70 | 30 | 340 | 34 | 20 |
| 41 | 14.624809 | 53.993843 | 19 | 90 | 10 | 339 | 35 | 10 |
| 42 | 14.627442 | 53.994570 | 27 | 90 | 10 | 338 | 33 | 70 |
| 43 | 14.630231 | 53.995289 | 25 | 90 | 10 | 341 | 33 | 10 |
| 44 | 14.633089 | 53.995926 | 9  | 50 | 50 | 341 | 30 | -  |
| 45 | 14.635940 | 53.996552 | 12 | 20 | 80 | 343 | 35 | -  |
| 46 | 14.638729 | 53.997285 | 8  | 60 | 40 | 341 | 27 | 10 |
| 47 | 14.641618 | 53.997853 | 10 | 90 | 10 | 346 | 28 | 10 |
| 48 | 14.644526 | 53.998392 | 11 | 50 | 50 | 348 | 33 | 30 |

Table S1. Parameters of individual sectors
